# Supplementary material for: Unveiling the partners of the DRBD2-mRNP complex, an RBP in Trypanosoma cruzi and ortholog to the yeast SR-protein Gbp2
Source: BMC Microbiol. 2019 Jun 11;19:128. doi: 10.1186/s12866-019-1505-8 (PMC6560856; doi:10.1186/s12866-019-1505-8)
Supplement: Supplementary file 5 — Table S2. Transcripts identified by the ribonomic analysis of the DRBD2-mRNP complex. Transcripts identified by RNA-seq from the DRBD2-mRNP complex from epimastigotes in exponential growth. The table also shows the transcripts regulated by DRBD2 that are associated with polysomes in epimastigotes and metacyclic trypomastigotes, information provided by Smircich et al. (XLSX 224 kb) [file 12866_2019_1505_MOESM5_ESM.xlsx]

## Sheet: DRBD2 ribonomics
TriTrypDB ID	Product description	Max group mean	Log₂ fold change	Fold change	P-value	FDR p-value
TCDM_00379	26S protease regulatory subunit	15.9589	2.81502	7.03727	0.000220331	0.00415784
TCDM_01381	Adenine phosphoribosyltransferase	38.4661	2.51388	5.71153	0.000757472	0.0108599
TCDM_06351	ATP-dependent DEAD/H DNA helicase recQ family	16788.1	12.3291	5145.66	1.22211e-09	2.24672e-07
TCDM_10796	ATPase	34.1105	3.66094	12.6489	0.000785729	0.0111251
TCDM_12205	complement regulatory protein	12.9283	3.61758	12.2744	0.000548948	0.00843249
TCDM_07203	D-alanyl-glycyl endopeptidase-like protein	20.4754	3.12592	8.7296	0.000180037	0.00354415
TCDM_05198	DNA polymerase delta catalytic subunit	53.3525	4.80225	27.901	0.000150402	0.0030777
TCDM_05765	DNA-directed RNA polymerase III subunit	34.7147	3.46758	11.0623	0.000486092	0.00764039
TCDM_05391	fatty acid elongase	18.0656	2.5951	6.04232	0.000377357	0.00636259
TCDM_09209	fructosamine kinase	41.1745	3.38127	10.4199	0.000728998	0.0105312
TCDM_00118	Gim5A protein	132.559	3.28595	9.75373	0.000755971	0.0108521
TCDM_14363	hypothetical protein	1629.85	7.63425	198.672	1.69228e-05	0.000528455
TCDM_09386	hypothetical protein	929.523	7.40647	169.656	0.000119588	0.00255734
TCDM_01670	hypothetical protein	605.601	7.25276	152.51	4.2604e-05	0.00111376
TCDM_14159	hypothetical protein	192.692	6.8834	118.062	6.726e-06	0.000253725
TCDM_01210	hypothetical protein	516.807	6.8761	117.466	7.15892e-05	0.00169995
TCDM_13811	hypothetical protein	386.653	6.71952	105.384	2.46818e-05	0.000712212
TCDM_09098	hypothetical protein	1242.5	6.53488	92.7243	0.000356559	0.00613998
TCDM_06973	hypothetical protein	502.231	5.8569	57.9566	0.000170204	0.00339158
TCDM_12372	hypothetical protein	30.653	5.63438	49.6727	1.11393e-05	0.000371329
TCDM_03204	hypothetical protein	323.38	5.20575	36.9051	0.000614734	0.00920474
TCDM_12807	hypothetical protein	58.7223	4.74867	26.8839	0.000359431	0.00615064
TCDM_00712	hypothetical protein	101.032	4.59351	24.1426	0.000140029	0.00292317
TCDM_09723	hypothetical protein	94.0429	4.52536	23.0286	0.000343862	0.00600206
TCDM_03727	hypothetical protein	34.1031	4.49528	22.5535	0.000141385	0.00294071
TCDM_13534	hypothetical protein	9.55795	4.35126	20.4108	0.000172875	0.00342089
TCDM_06859	hypothetical protein	167.138	4.23741	18.862	0.000667523	0.00983001
TCDM_08048	hypothetical protein	13.594	4.01362	16.1518	3.8054e-05	0.00101883
TCDM_13669	hypothetical protein	7.49597	3.94966	15.4513	0.000190704	0.00372199
TCDM_14079	hypothetical protein	27.0651	3.93338	15.2779	9.19002e-06	0.000324297
TCDM_13037	hypothetical protein	79.9902	3.90024	14.931	0.000263182	0.00482679
TCDM_04048	hypothetical protein	49.9073	3.75491	13.5002	4.32021e-05	0.00112424
TCDM_00934	hypothetical protein	37.3624	3.71907	13.169	0.00031649	0.00558414
TCDM_02364	hypothetical protein	87.4903	3.71221	13.1065	0.000191506	0.00373126
TCDM_07935	hypothetical protein	6.66783	3.6115	12.2228	0.000708733	0.0103037
TCDM_13524	hypothetical protein	55.7154	3.54305	11.6564	0.000619241	0.00924363
TCDM_14171	hypothetical protein	79.5746	3.53037	11.5544	0.000405577	0.00667066
TCDM_06468	hypothetical protein	11.2246	3.50481	11.3515	0.000315575	0.00557663
TCDM_01286	hypothetical protein	50.2717	3.4816	11.1703	0.000952244	0.0128904
TCDM_10239	hypothetical protein	60.1665	3.34751	10.1789	0.00109502	0.0144959
TCDM_14224	hypothetical protein	172.441	3.32194	10.0001	0.000657051	0.00971345
TCDM_12572	hypothetical protein	7.13507	3.27424	9.67484	0.000411783	0.00675324
TCDM_00595	hypothetical protein	17.3849	3.24388	9.4734	0.000986779	0.0132947
TCDM_08371	hypothetical protein	14.4223	3.1783	9.05239	0.000615372	0.00920474
TCDM_11508	hypothetical protein	43.0612	3.09186	8.52592	0.000226472	0.0042526
TCDM_02495	hypothetical protein	10.5186	2.96992	7.83491	0.000122549	0.002606
TCDM_13052	hypothetical protein	9.84781	2.93451	7.64496	0.000261918	0.00481507
TCDM_03259	hypothetical protein	23.721	2.91237	7.52854	0.000148618	0.00305767
TCDM_04746	hypothetical protein	24.6137	2.87654	7.34388	0.000121088	0.00258021
TCDM_01259	hypothetical protein	72.5293	2.87577	7.33993	0.000115322	0.00248946
TCDM_00995	hypothetical protein	81.8187	2.84921	7.20605	0.000349188	0.00606959
TCDM_00656	hypothetical protein	19.6378	2.82048	7.06399	0.000442822	0.00711889
TCDM_12557	hypothetical protein	27.4653	2.81729	7.04839	0.000608251	0.00914326
TCDM_00946	hypothetical protein	35.8102	2.77988	6.86794	0.000874154	0.012085
TCDM_14111	hypothetical protein	26.3549	2.76575	6.80103	0.000674871	0.00990366
TCDM_09546	hypothetical protein	122.01	2.69789	6.48854	0.000726494	0.0105083
TCDM_14276	hypothetical protein	56.1829	2.69026	6.4543	0.000930359	0.0126693
TCDM_04428	hypothetical protein	12.0162	2.6881	6.44462	0.00101407	0.0136301
TCDM_00463	hypothetical protein	14.3802	2.66968	6.36289	0.00031096	0.0055036
TCDM_08228	hypothetical protein	31.5426	2.61355	6.12009	0.000782057	0.0111007
TCDM_00810	hypothetical protein	15.7968	2.60856	6.09897	0.00109903	0.0145322
TCDM_08433	hypothetical protein	11.0603	2.51171	5.70297	0.000903637	0.0123704
TCDM_07386	kynureninase	26.9206	2.75322	6.74222	0.00052711	0.00821888
TCDM_10538	lipase	21.5344	2.39292	5.25219	0.000648979	0.00963159
TCDM_14283	mitochondrial import inner membrane translocase subunit TIM17	38.8815	2.74349	6.69689	0.000871127	0.0120792
TCDM_03710	nuclear lim interactor-interacting factor	19.4656	3.6824	12.8384	0.000237974	0.00442484
TCDM_11018	P27 protein	117.38	3.72421	13.216	0.000116823	0.00251711
TCDM_00586	protein kinase	20.1542	2.74797	6.71771	0.000621122	0.00925432
TCDM_03688	putative ATP-dependent DEAD/H RNA helicase	39.7791	3.67521	12.7746	7.57233e-05	0.00176142
TCDM_01186	putative Mitochondrial elongation factor G	28.2534	2.97617	7.86895	0.000462172	0.00734705
TCDM_06310	quiescin sulfhydryl oxidase	7.15604	3.9511	15.4668	0.000188679	0.00369512
TCDM_13613	retrotransposon hot spot (RHS) protein	10.02	3.35887	10.2594	0.000220184	0.00415784
TCDM_11971	retrotransposon hot spot (RHS) protein	11.3667	2.69591	6.47965	0.00059975	0.00907829
TCDM_13051	retrotransposon hot spot (RHS) protein	37.0215	2.55687	5.88428	0.000784706	0.0111245
TCDM_02352	RNA-binding protein	695.004	6.17889	72.4489	0.000127123	0.00268323
TCDM_03285	small GTP-binding protein Rab11	123.34	3.42476	10.7388	0.00090042	0.0123704
TCDM_03172	small GTP-binding protein RAB6	53.5693	3.82494	14.1717	0.000439863	0.00708131
TCDM_10306	surface protease GP63	10.3077	2.6453	6.25626	0.000965606	0.0130248
TCDM_12750	trans-sialidase	47.3383	5.85644	57.9381	2.08945e-05	0.000618586
TCDM_05996	trans-sialidase	10.9253	3.09812	8.56303	0.00054006	0.00831838
TCDM_10073	trans-sialidase	5.33383	2.59653	6.0483	0.00113131	0.0148215
TCDM_02335	UDP-galactose transporter	190.16	4.84359	28.7122	0.000550906	0.00843981
TCDM_13701	unspecified product	347.664	5.53776	46.455	0.000288408	0.00518537
TCDM_05675	unspecified product	284.03	5.32834	40.1781	0.000434392	0.00704296
TCDM_04153	unspecified product	6.2552	3.30738	9.89968	0.000767664	0.0109785
TCDM_01387	zinc finger protein	15.0029	2.9116	7.52453	0.000814685	0.0114631

## Sheet: Ribosome profiling Smircich2015
Most abundant transcripts regulated by DRBD2 that are associated to polysomes in epimastigotes and metacyclic trypomastigotes
Data avaiable in TriTryp DB plataform (http://tritrypdb.org/tritrypdb/)
Reference: Smircich, P. et. al. Ribosome profiling reveals translation control as a key mechanism generating differential gene expression in Trypanosoma cruzi. BMC Genomics, 2015.
Gene	Sample	Value	Standard Error
TCDM_06351
TcCLB.506941.90	epi Ribo-seq - unique	16.64	1.8
TcCLB.506941.90	epi RNASeq - unique	50.73	3.14
TcCLB.506941.90	trypo Ribo-seq - unique	15.77	7.89
TcCLB.506941.90	trypo RNASeq - unique	54.24	5.73
TCDM_14363
TcCLB.506773.104	epi Ribo-seq - unique	64.58	23.12
TcCLB.506773.104	epi RNASeq - unique	276.46	16.23
TcCLB.506773.104	trypo Ribo-seq - unique	103.55	49.27
TcCLB.506773.104	trypo RNASeq - unique	241.16	64.98
TCDM_01670
TcCLB.506885.50	epi Ribo-seq - unique	26.41	4.59
TcCLB.506885.50	epi RNASeq - unique	59.38	3.34
TcCLB.506885.50	trypo Ribo-seq - unique	40.11	12.08
TcCLB.506885.50	trypo RNASeq - unique	92.53	3.9
TCDM_14159
TcCLB.507711.50	epi Ribo-seq - unique	32.58	7.61
TcCLB.507711.50	epi RNASeq - unique	93.11	5.89
TcCLB.507711.50	trypo Ribo-seq - unique	2.01	2.01
TcCLB.507711.50	trypo RNASeq - unique	80.48	8.12
TCDM_01210
TcCLB.510289.10	epi Ribo-seq - unique	24.59	5.3
TcCLB.510289.10	epi RNASeq - unique	28.32	1.02
TcCLB.510289.10	trypo Ribo-seq - unique	15.14	7.21
TcCLB.510289.10	trypo RNASeq - unique	15.84	2.11
TCDM_02352
TcCLB.511277.200	epi Ribo-seq - tcruCLBrenerNon-Esmeraldo-like - unique	212.35	67.34
TcCLB.511277.200	epi RNASeq - tcruCLBrenerNon-Esmeraldo-like - unique	20.37	2.3
TcCLB.511277.200	trypo Ribo-seq - tcruCLBrenerNon-Esmeraldo-like - unique	66.55	11.77
TcCLB.511277.200	trypo RNASeq - tcruCLBrenerNon-Esmeraldo-like - unique	61.44	11.54
TCDM_06973
TcCLB.511907.290	epi Ribo-seq - tcruCLBrenerNon-Esmeraldo-like - unique	29.75	11.18
TcCLB.511907.290	epi RNASeq - tcruCLBrenerNon-Esmeraldo-like - unique	99.97	10.87
TcCLB.511907.290	trypo Ribo-seq - tcruCLBrenerNon-Esmeraldo-like - unique	1.1	0.81
TcCLB.511907.290	trypo RNASeq - tcruCLBrenerNon-Esmeraldo-like - unique	20.65	10.42
TCDM_12750
TcCLB.398477.10	epi Ribo-seq - tcruCLBrenerNon-Esmeraldo-like - unique	0.53	0.16
TcCLB.398477.10	epi RNASeq - tcruCLBrenerNon-Esmeraldo-like - unique	2.27	0.43
TcCLB.398477.10	trypo Ribo-seq - tcruCLBrenerNon-Esmeraldo-like - unique	81.16	20.24
TcCLB.398477.10	trypo RNASeq - tcruCLBrenerNon-Esmeraldo-like - unique	132.63	28.78
TCDM_12372
TcCLB.503417.50	epi Ribo-seq - tcruCLBrenerNon-Esmeraldo-like - unique	0.72	0.72
TcCLB.503417.50	epi RNASeq - tcruCLBrenerNon-Esmeraldo-like - unique	1.71	0.42
TcCLB.503417.50	trypo Ribo-seq - tcruCLBrenerNon-Esmeraldo-like - unique	0	0
TcCLB.503417.50	trypo RNASeq - tcruCLBrenerNon-Esmeraldo-like - unique	1.53	1.53
TCDM_13701
TcCLB.507787.150	epi Ribo-seq - tcruCLBrenerNon-Esmeraldo-like - unique	0.04	0.04
TcCLB.507787.150	epi RNASeq - tcruCLBrenerNon-Esmeraldo-like - unique	0.26	0.06
TcCLB.507787.150	trypo Ribo-seq - tcruCLBrenerNon-Esmeraldo-like - unique	0	0
TcCLB.507787.150	trypo RNASeq - tcruCLBrenerNon-Esmeraldo-like - unique	0.72	0.41
TCDM_03204
TcCLB.509599.164	epi Ribo-seq - unique	19	8.15
TcCLB.509599.164	epi RNASeq - unique	58	0.37
TcCLB.509599.164	trypo Ribo-seq - unique	7.97	2.9
TcCLB.509599.164	trypo RNASeq - unique	153.87	7.66

## Sheet: Sheet1
Most abundant transcripts regulated by DRBD2 that are associated to polysomes in epimastigotes and metacyclic trypomastigotes
Data avaiable in TriTryp DB plataform (http://tritrypdb.org/tritrypdb/)
Reference: Smircich, P. et. al. Ribosome profiling reveals translation control as a key mechanism generating differential gene expression in Trypanosoma cruzi. BMC Genomics, 2015.
Gene	Sample	Value							Standard Error
		TCDM_06351	TCDM_14363	TCDM_01670	TCDM_14159	TCDM_01210	TCDM_02352	TCDM_06973	TCDM_06351	TCDM_14363	TCDM_01670	TCDM_14159	TCDM_01210	TCDM_02352	TCDM_06973
TcCLB.506941.90	epimastigote Ribo-seq	16.64	64.58	26.41	32.58	24.59	212.35	29.75	1.8	23.12	4.59	7.61	5.3	67.34	11.18
TcCLB.506941.90	epimastigote RNA-Seq	50.75	276.46	59.38	93.11	28.32	20.37	99.97	3.14	16.23	3.34	5.89	1.02	2.3	10.87
TcCLB.506941.90	trypomastigote Ribo-seq	15.77	103.55	40.11	2.01	15.14	66.55	1.1	7.89	49.27	12.08	2.01	7.21	11.77	0.81
TcCLB.506941.90	trypomastigote RNA-Seq	54.24	241.16	92.53	80.48	15.84	61.44	20.65	5.73	64.98	3.9	8.12	2.11	11.54	10.42
