# Supplementary material for: Unveiling the partners of the DRBD2-mRNP complex, an RBP in Trypanosoma cruzi and ortholog to the yeast SR-protein Gbp2
Source: BMC Microbiol. 2019 Jun 11;19:128. doi: 10.1186/s12866-019-1505-8 (PMC6560856; doi:10.1186/s12866-019-1505-8)
Supplement: Supplementary file 6 — Table S3. DRBD2-mRNP complex RNA-seq mapping statistics information. (XLSX 5 kb) [file 12866_2019_1505_MOESM6_ESM.xlsx]

## Sheet: DRBD2_2 trimmed RNA-Seq rep...
Read count statistics
